# Supplementary material
Source: publisher figshare collection journal article supplement (https://acs.figshare.com/ndownloader/files/3633216)
Supplement: Supplementary file 1 [file 3633216]

*In situ* observation of fouling behavior under thermal  
cracking conditions: Hue, Saturation, Intensity  
Image Analyses

Supporting Information

*Cedric Laborde-Boutet,\* David Dinh, Fabian Bender, Miguel Medina, William C. McCaffrey*

University of Alberta, Department of Chemical and Materials Engineering, Edmonton, AB, T6G  
2V4, Canada

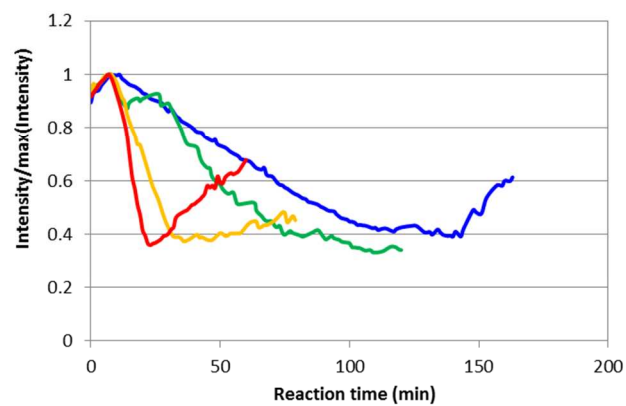

**Figure S1.** Normalized Brightness Intensity of the micrographs taken during thermal cracking reactions of Cerro Negro Crude with setpoint temperatures of 410 °C (blue), 420 °C (green), 435 °C (orange), 450 °C (red).

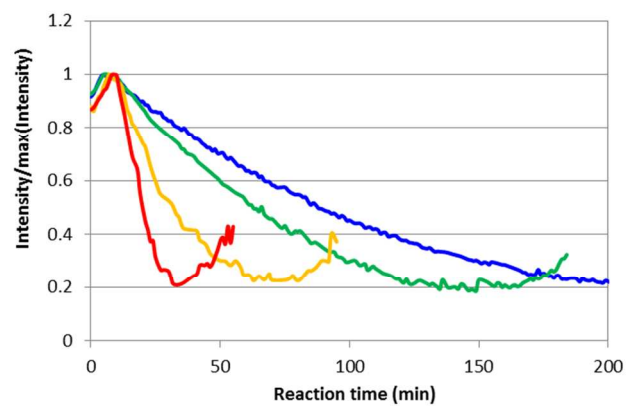

**Figure S2.** Normalized Brightness Intensity of the micrographs taken during thermal cracking reactions of Cold Lake Bitumen with setpoint temperatures of 410 °C (blue), 420 °C (green), 435 °C (orange), 450 °C (red).

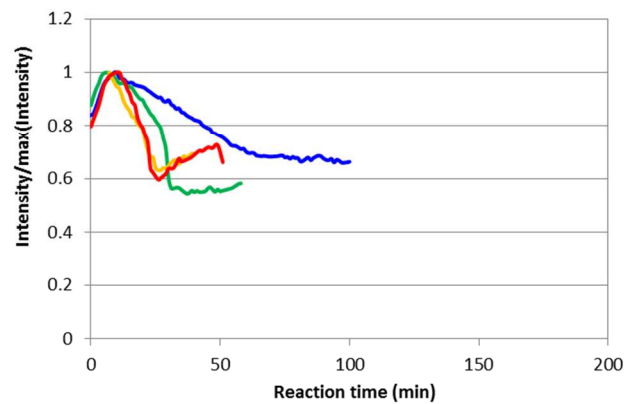

**Figure S3.** Normalized Brightness Intensity of the micrographs taken during thermal cracking reactions of Colombian VR with setpoint temperatures of 410 °C (blue), 420 °C (green), 435 °C (orange), 450 °C (red).

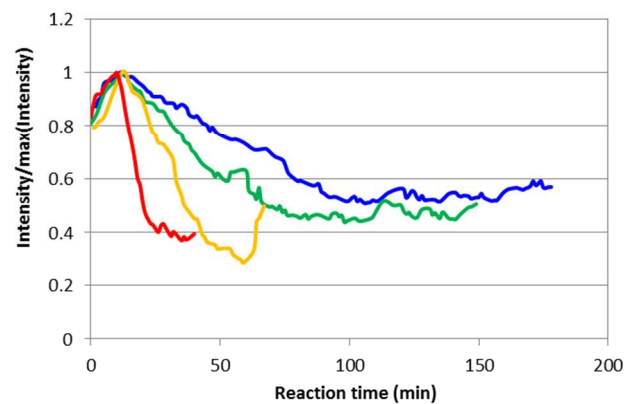

**Figure S4.** Normalized Brightness Intensity of the micrographs taken during thermal cracking reactions of Safaniya VR with setpoint temperatures of 410 °C (blue), 420 °C (green), 435 °C (orange), 450 °C (red).

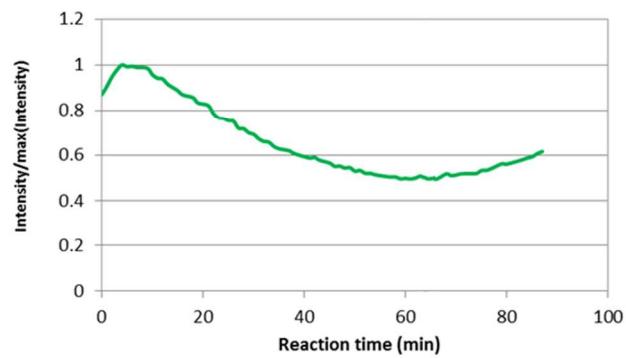

**Figure S5.** Normalized Brightness Intensity of the micrographs taken during thermal cracking reactions of Pentane-Extracted Asphaltenes with a setpoint temperature of 420 °C.

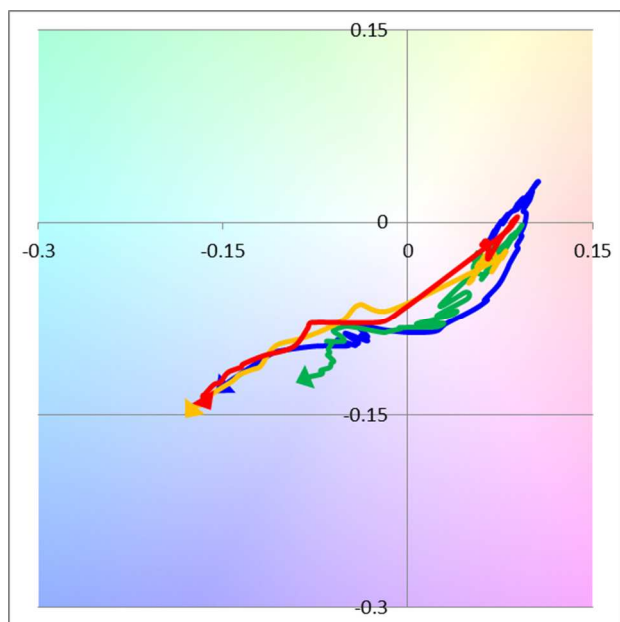

**Figure S6.** Hue and Saturation trajectories in thermal cracking reactions of Cerro Negro Crude at setpoint temperatures of 410 °C (blue), 420 °C (green), 435 °C (orange), and 450 °C (red).

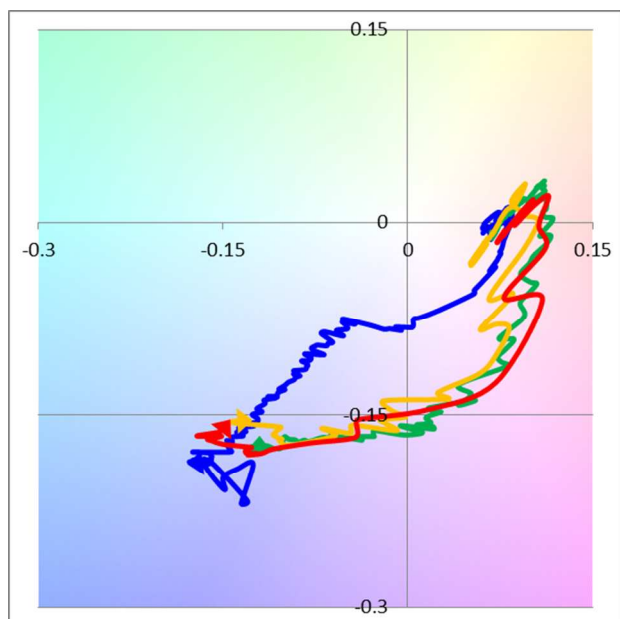

**Figure S7.** Hue and Saturation trajectories in thermal cracking reactions of Cold Lake Bitumen at setpoint temperatures of 410 °C (blue), 420 °C (green), 435 °C (orange), and 450 °C (red).



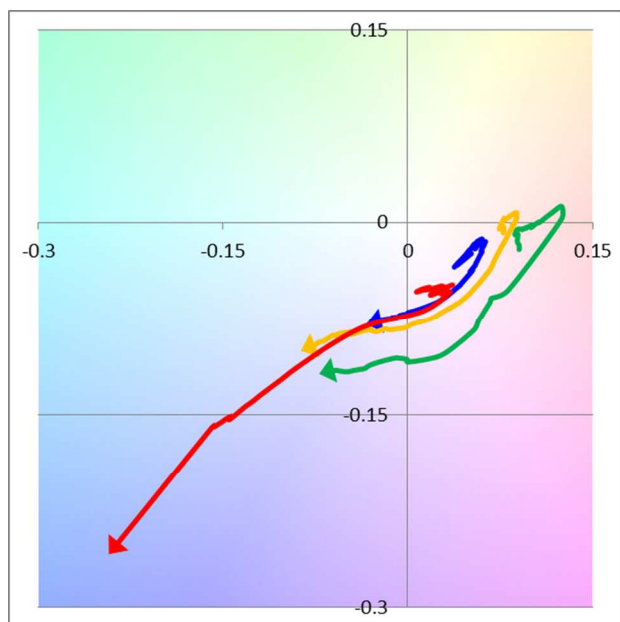

**Figure S8.** Hue and Saturation trajectories in thermal cracking reactions of Colombian VR at setpoint temperatures of 410 °C (blue), 420 °C (green), 435 °C (orange), and 450 °C (red).

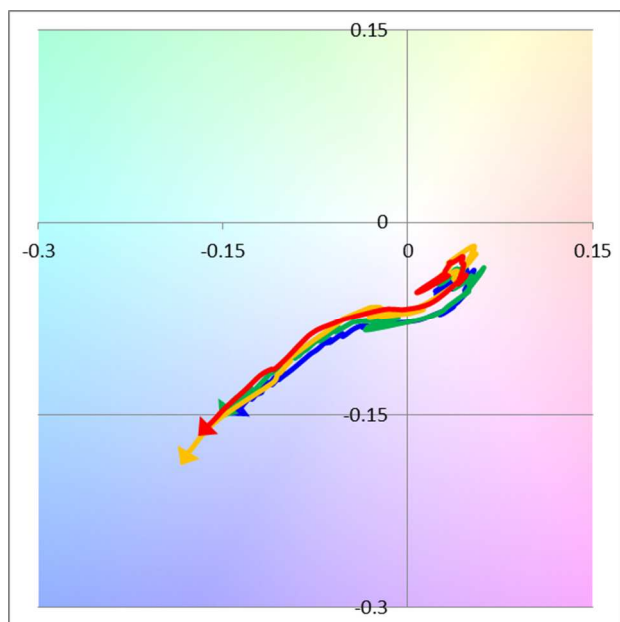

**Figure S9.** Hue and Saturation trajectories in thermal cracking reactions of Safaniya VR at setpoint temperatures of 410 °C (blue), 420 °C (green), 435 °C (orange), and 450 °C (red).

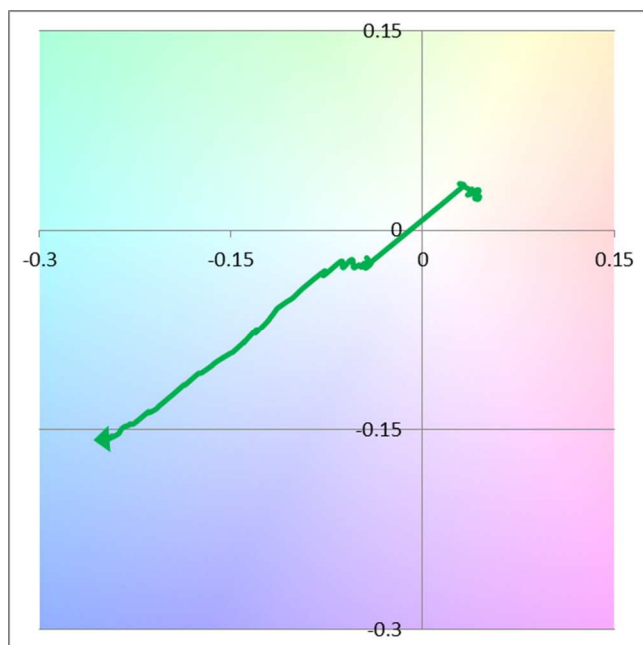

**Figure S10.** Hue and Saturation trajectory in thermal cracking reactions of Pentane-Extracted Asphaltenes at setpoint temperature of 420 °C.
